# Supplementary material for: Boosting the oxygen reduction activity of non-metallic catalysts via geometric and electronic engineering through nitrogen and chlorine dual-doping
Source: Royal Society of Chemistry journal article supplement (doi:10.1039/d4dt01519c), 2024-01-01
Supplement: d4dt01519c1.pdf [file d4dt01519c1.pdf]

Supporting Information

**Boosting Oxygen Reduction Activity of Non-metallic Catalysts via Geometric and Electronic Engineering through Nitrogen and Chlorine Dual-Doping**

Dong-Li Meng<sup>ab\*</sup>, Tao-Tao Liu<sup>c</sup>, Ming-Hui Wu<sup>ab</sup>, Jing-Wen He<sup>d</sup>, Shao-Wu Du<sup>ab</sup>,  
Yuan-Biao Huang<sup>e\*</sup>

*<sup>a</sup>College of Materials and Chemical Engineering, MinJiang University, Fuzhou 35108, P. R. China*

*<sup>b</sup>Fujian Key Laboratory of Functional Marine Sensing Materials, Minjiang University, Fuzhou 350108, China*

*<sup>c</sup>College of Chemistry and Chemical Engineering, Henan Institute of Science and Technology, Xinxiang 453000, China*

*<sup>d</sup>College of Chemistry, Fuzhou University, Fuzhou 350108, China*

*<sup>e</sup>State Key Laboratory of Structural Chemistry Fujian Institute of Research on the Structure of Matter, Chinese Academy of Sciences, Fuzhou 350002, China*

## **S1: Materials and Instrumentation:**

All chemicals were purchased from commercial sources and used without further treatment unless otherwise stated. zinc chloride ( $\text{ZnCl}_2$ , TCI, 98%), paraformaldehyde ( $(\text{CH}_2\text{O})_n$ , Aladdin, 95%), glyoxal ( $\text{C}_2\text{H}_2\text{O}_2$ , Sinopharm Chemical Reagent Co., Ltd., 40% in  $\text{H}_2\text{O}$ ), hydrochloric acid ( $\text{HCl}$ , Sinopharm Chemical Reagent Co., Ltd., 38%), perchloric acid ( $\text{HClO}_4$ , Sinopharm Chemical Reagent Co., Ltd., 70.0-72.0% ), N,N-dimethylformamide ( $\text{C}_3\text{H}_7\text{NO}$ , Sinopharm Chemical Reagent Co., Ltd., AR), acetone ( $\text{CH}_3\text{COCH}_3$ , Sinopharm Chemical Reagent Co., Ltd., AR), methylbenzene ( $\text{C}_7\text{H}_8$ , Sinopharm Chemical Reagent Co., Ltd., AR), Pt-C (Alfa Aesar, 20 wt% metal), nafion solution (Sigma-Aldrich, 5% in lower aliphatic alcohols and water) were purchased from the commercial corporations.

The Raman spectrum was tested on a Labram HR800 Evolution over a range of 300-2000  $\text{cm}^{-1}$ . X-ray photoelectron spectroscopy (XPS) measurements were performed on an ESCALAB 250Xi X-ray photoelectron spectrometer (Thermo Fisher) using an Al K $\alpha$  source (15 kV, 10 mA). Powder X-ray diffraction (PXRD) patterns were recorded on a Miniflex 600 diffractometer using Cu K $\alpha$  radiation ( $\lambda = 0.154 \text{ nm}$ ) with a scan speed of  $2^\circ \text{ min}^{-1}$  at room temperature. Transmission electron microscope (TEM) images were recorded by a FEIT 20 working at 200 kV. Aberration-corrected High-angle annular dark-field scanning transmission electron microscopy (HAADF-STEM) images and the EDS of samples were performed with a Titan Cubed Themis G2 300 (FEI) high-resolution transmission electron microscope operated at 200 kV.  $\text{N}_2$  adsorption-desorption isotherm were measured using Micromeritics ASAP 2460 instrument at 77 K. Prior to nitrogen adsorption/desorption measurement, the samples were evacuated and activated at 120  $^\circ\text{C}$  for 10 h by molecular pump. The Nyquist plots were obtained by the electrochemical impedance spectroscopy (EIS) measurement. It was performed by applying AC voltage with 5 mV amplitude in a frequency range from 0.01 Hz to 100 kHz under open circuit potential condition.

Table S1. Element content catalyzed by XPS

|          | N    | Cl   |
|----------|------|------|
|          | %    | %    |
| CCTF-500 | 5.27 | 0.54 |
| CCTF-600 | 5.08 | 0.60 |
| CCTF-700 | 4.76 | 0.62 |

Catalyzed by XPS.

Table S2. Element content catalyzed by element analysis

|          | C     | N    | H    |
|----------|-------|------|------|
|          | %     | %    | %    |
| CCTF-500 | 82.02 | 6.61 | 2.65 |
| CCTF-600 | 75.46 | 5.51 | 2.2  |
| CCTF-700 | 72.19 | 4.55 | 1.9  |

Catalyzed by element analysis.

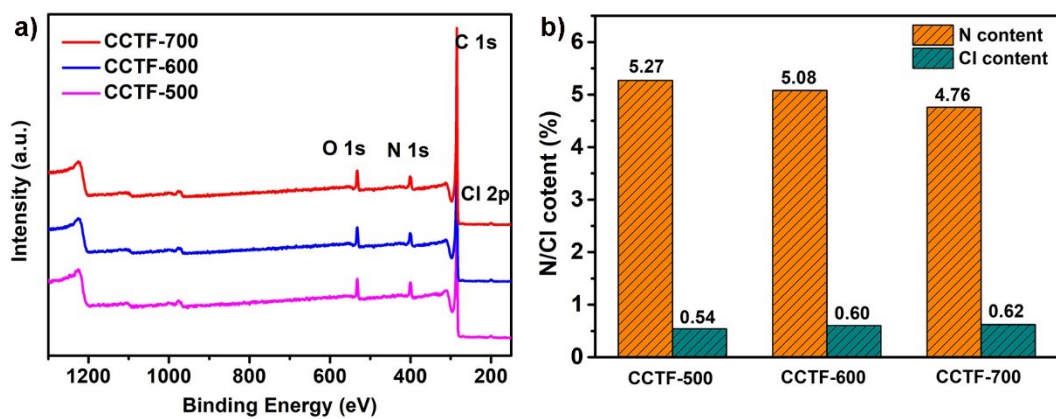

Figure S1. a) XPS survey spectrum, b) N and Cl content determined from XPS of CCTF-500, CCTF-600, CCTF-700.

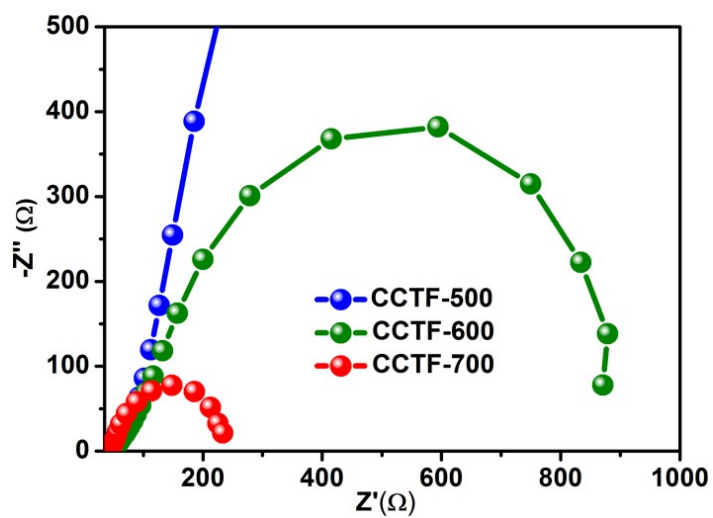

Figure S2. Nyquist plots of CCTF-500, CCTF-600, CCTF-700 over the frequency range from 100 kHz to 10 mHz.

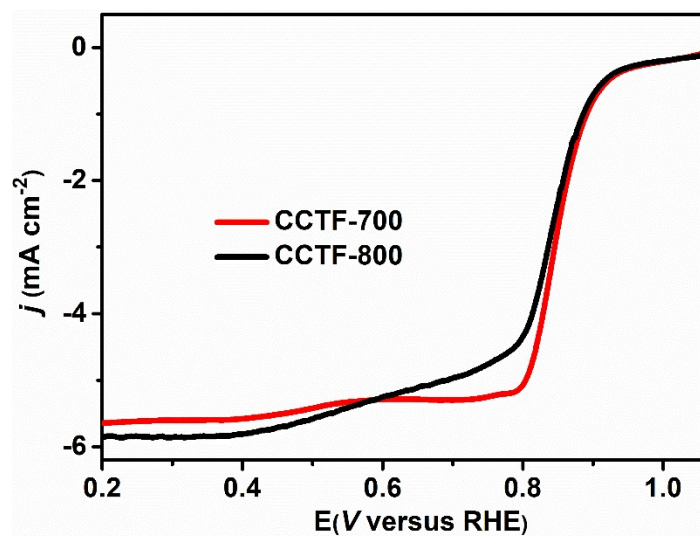

Figure S3. LSV curves of CCTF-700 and CCTF-800.

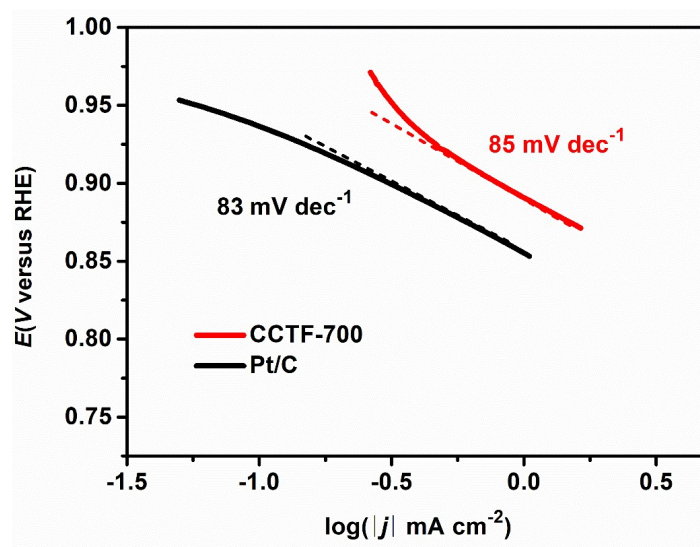

Figure S4. The corresponding Tafel plots obtained from the RDE polarization curves in 0.1 M KOH.

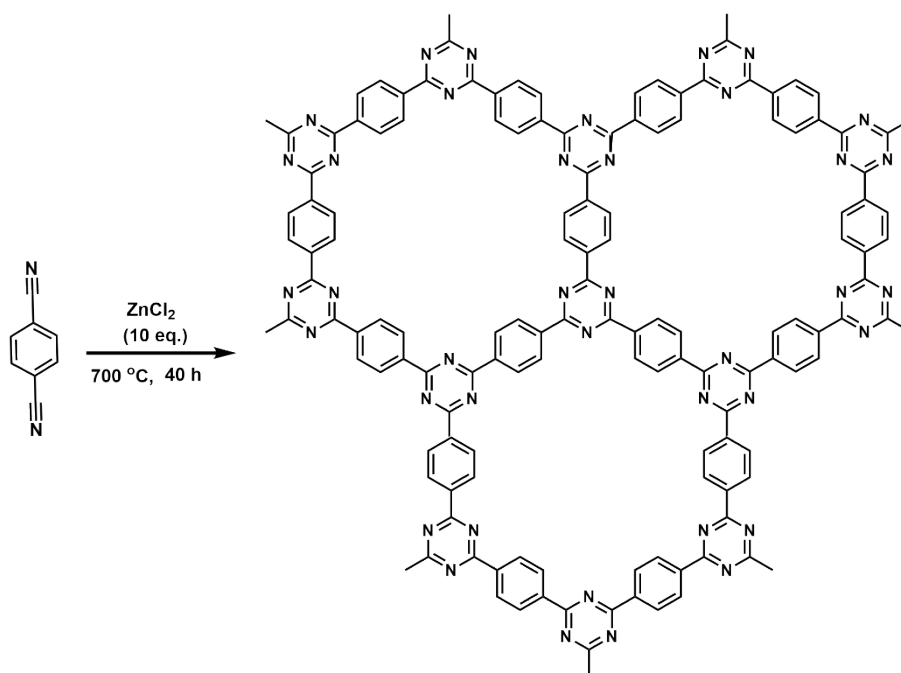

Scheme S1. Schematic representation of CTP-700.

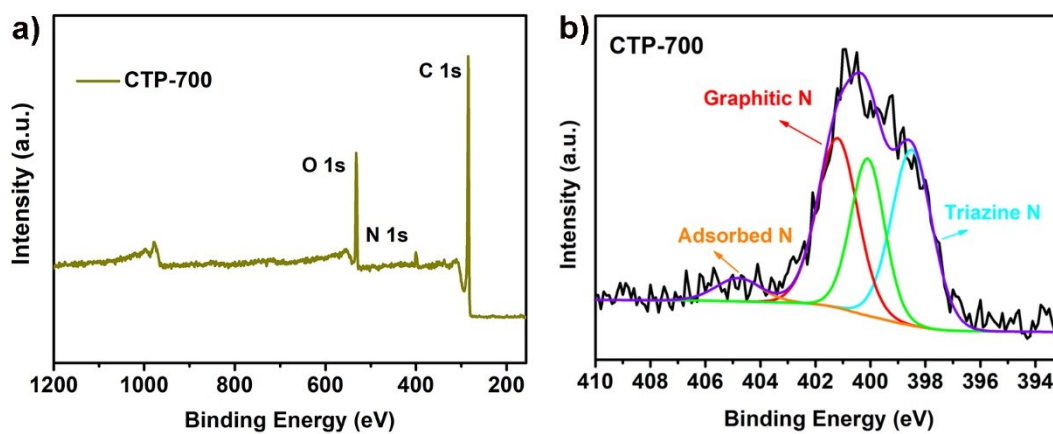

Figure S5. (a) XPS survey spectrum and (b) The high-resolution N 1s XPS spectra of CTP-700.

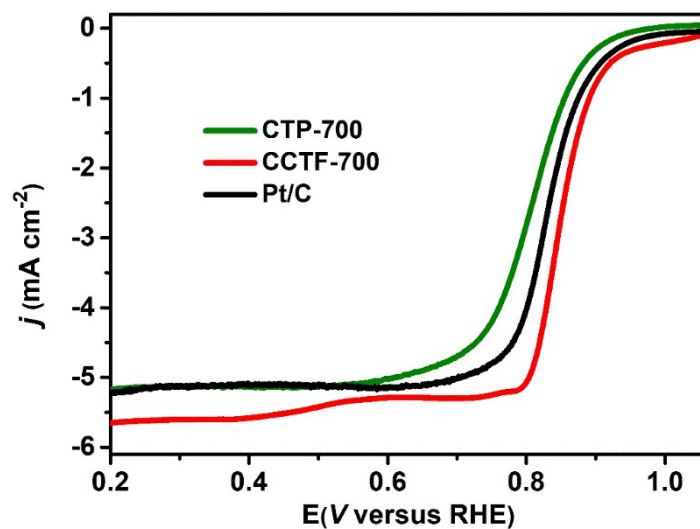

Figure S6. LSVs of different samples at 1600 rpm in 0.1M KOH.

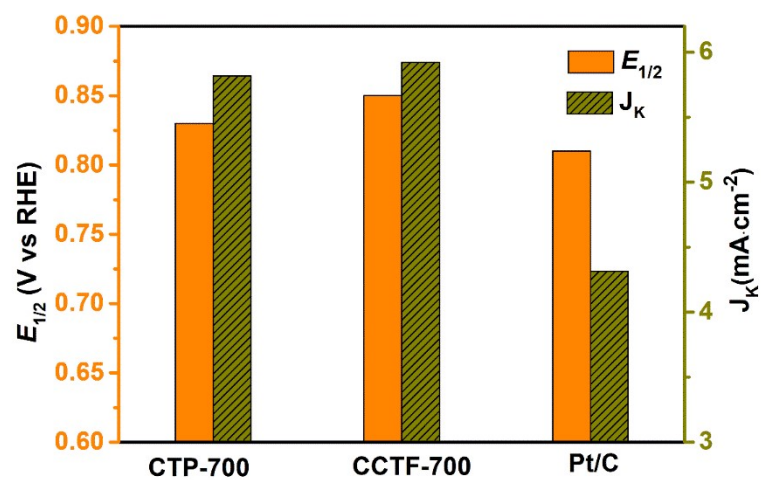

Figure S7.  $E_{1/2}$  and  $J_k$  at 0.85 V for various catalysts in 0.1 M KOH.

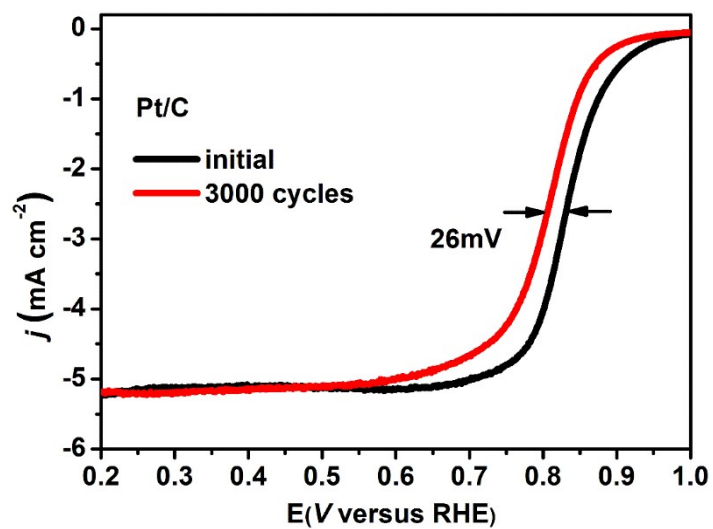

Figure S8. LSV curves of the commercial Pt/C before and after 3000 cycles.

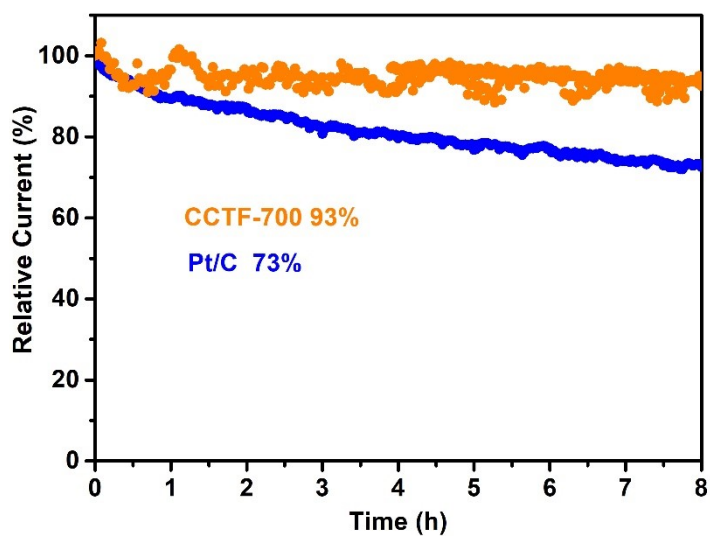

Figure S9. The current-time chronoamperometric responses of CCTF-700 and Pt/C 0.1 M KOH.



Table S3. Comparison of ORR catalytic performances in 0.1M KOH between CTF-700 and other metal-free electrocatalysts.

| Class                | Catalyst    | Heteroatoms | Half-wave potential (V vs. RHE) | Onset potential (V vs. RHE) | Ref.                                                       |
|----------------------|-------------|-------------|---------------------------------|-----------------------------|------------------------------------------------------------|
| One heteroatom doped | CCTF-700    | N,Cl        | 0.85                            | 1.03                        | This work                                                  |
|                      | Pt/C        |             | 0.81                            | 1.0                         | This work                                                  |
|                      | 1.13% NCNTs | N           | ~0.65                           | 0.76                        | <i>Small</i> , 2023, 19, 2302795                           |
|                      | Q3CTP-COFs  | N           | 0.72                            | 0.92                        | <i>Nano-Micro Lett.</i> 2023, 15,159                       |
|                      | NPCM1000    | N           | 0.755                           | 0.875                       | <i>Energy</i> , 2018, 152, 333–340                         |
|                      | MPSA/GO1000 | N           | 0.82                            | 1.00                        | <i>Angew. Chem. Int.Ed.</i> , 2016, 55, 2230               |
|                      | BINOL-CTFs  | N           | 0.737                           | 0.793                       | <i>ACS Appl. Mater. Interfaces</i> , 2023, 40, 44689–44699 |
|                      | N/POPQ800   | N           | 0.728                           | 0.832                       | <i>ACS Appl. Energy Mater.</i> , 2022, 5, 15899–15908      |
|                      | Trz-COP     | N           | 0.73                            | ~0.8                        | <i>Chem. Commun.</i> , 2022, 58, 5506–5509                 |
|                      | d-pGCS-1000 | N           | 0.82                            | 0.95                        | <i>Chem. Eng. Sci.</i> , 2022, 259, 117816                 |
|                      | NDC1000     | N           | 0.86                            | 0.96                        | <i>Angew. Chem. Int.Ed.</i> , 2020, 59, 11999-12006        |
|                      | N-MCNs      | N           | 0.78                            | ~0.9                        | <i>Angew. Chem. Int.Ed.</i> , 2015, 54, 15191              |
|                      | NPC-S1.2    | N           | 0.72                            | 0.9                         | <i>J Am Chem Soc.</i> , 2017, 139, 12931–12934             |
|                      | NHC/rGO     | N           | ~0.80                           | ~0.94                       | <i>J. Mater. Chem. A</i> , 2017, 5, 23170–23178            |
|                      | N-hG        | N           | 0.83                            | 0.91                        | <i>Carbon</i> , 2020,162, 66-73                            |

|                      |                            |       |       |       |                                                  |
|----------------------|----------------------------|-------|-------|-------|--------------------------------------------------|
| Heteroatoms co-doped | JUC-616                    | N, Se | 0.78  | ~0.9  | <i>J. Mater. Chem. A</i> , 2023, 11, 18349-18355 |
|                      | NSC-10                     | N,S   | 0.81  | 0.94  | <i>Chinese chem. Lett.</i> , 2023, 34 ,107462    |
|                      | N,P-CGHNs                  | N, P  | 0.82  | 0.90  | <i>Adv. Mater.</i> 2016,28, 4606                 |
|                      | PSN-G3                     | P,S,N | 0.79  | ~1.0  | <i>Dalton Trans.</i> ,2023,52,4389–4397          |
|                      | TTF-F                      | N,F   | 0.77  | 0.86  | <i>Adv. Mater.</i> , 2015,27, 3190-3195          |
|                      | S,N-codoped graphene (SNG) | N, S  | 0.72  | 0.88  | <i>Carbon</i> , 2018, 134, 316–325               |
|                      | NS(3:1)-C-MOF-5            | N,S   | 0.82  | 0.96  | <i>J Mater Chem A</i> , 2014, 2, 6316–6319       |
|                      | NF–MG3                     | N, F  | 0.828 | 1.047 | <i>Nanoscale</i> , 2015, 7, 10584–10589          |
|                      | S–N–C                      | N,S   | 0.89  | 0.98  | <i>Dalton Trans.</i> , 2022, 51,18152–18158      |
|                      | N/S-2DPC60                 | N,S   | 0.75  | 0.86  | <i>Adv. Funct. Mater.</i> 2016, 32, 5893-5902    |
|                      | CNS                        | N,S   | 0.87  | 0.97  | <i>Carbon</i> , 2021, 184 , 127-135              |
|                      | L-Cy-rGO                   | N,S   | ~0.7  | 0.77  | <i>Energy Fuels</i> 2021, 35, 6823–6834          |

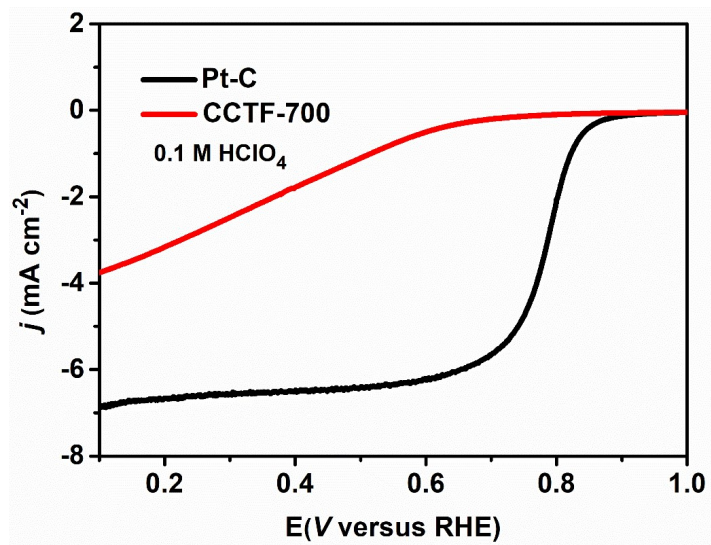

Figure S10. LSVs of CCTF-700 at 1600 rpm in 0.1M HClO<sub>4</sub>.
